# Supplementary material for: Effects of Olive (Olea europaea L.) Leaves with Antioxidant and Antimicrobial Activities on In Vitro Ruminal Fermentation and Methane Emission
Source: MDPI journal article supplement (doi:10.3390/ani11072008), 2021-07-05
Supplement: s1 [file s1]

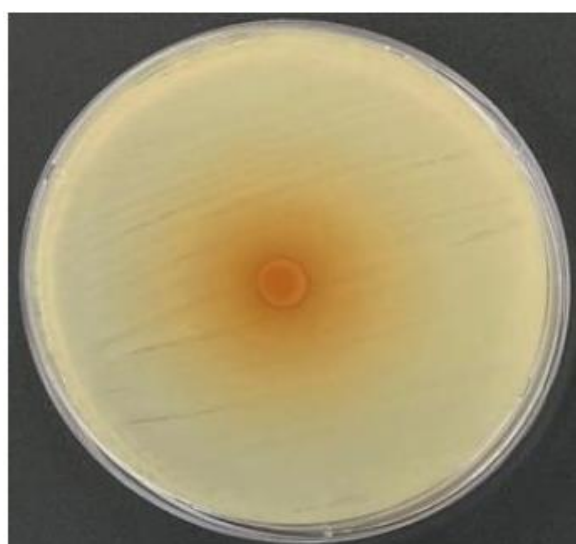

ATCC 4352

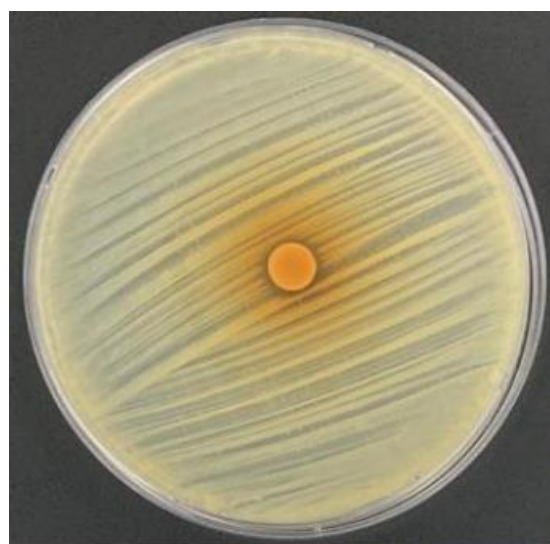

ATCC 6538

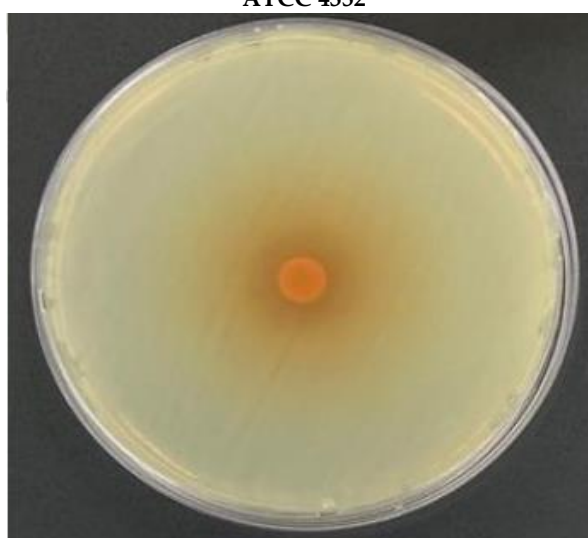

ATCC 8739

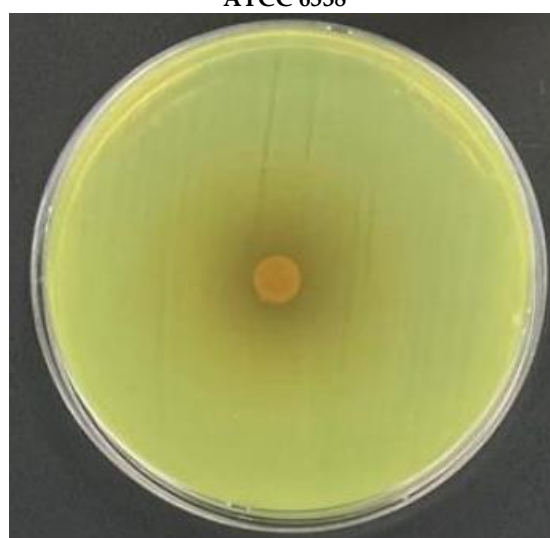

ATCC 10145

**Figure S1.** Antibacterial activities of Olive leaves against Gram-positive and negative bacteria.  
Gram-positive bacteria: a: *Staphylococcus aureus* (ATCC 6538)  
Gram-negative bacteria: b: *Escherichia coli* (ATCC 8739), c: *Klebsiella pneumoniae* (ATCC 4352), d: *Pseudomonas aeruginosa* (ATCC 10145)
